# Supplementary material
Source: Springer Nature journal article supplement (https://www.springermedizin.de/resource/supplementary/12916_2012_644_MOESM1_ESM.pdf/9598216)
Supplement: MOESM1 [file 9598216]

Potentially relevant studies identified and screened for retrieval (n=41)

26 studies excluded with reasons:  
-review articles (n=3)  
-not researches of microangiopathy (n=23)

Studies retrieved for more detailed evaluation (n=15)

4 studies excluded:  
-no data of retinopathy (n=2)  
-protein research (n=1)  
-not 4G/5G polymorphism (n=1)

Potentially appropriate studies to be included in the meta-analysis (n=11)

2 studies were excluded because:  
-same sample study (n=1)  
-cannot withdrawn accurate data (n=1)

Studies (with usable information) included in meta-analysis (n=9)
